1 **Functional characterization of the *ABF* gene family in upland cotton (*Gossypium hirsutum* L.)**

2

3 Tyson C. C. Kerr<sup>1,2</sup>, Haggag Abdel-Mageed<sup>1,3</sup>, MiYoung Kang<sup>1</sup>, Dakota Cryer<sup>1</sup>, and Randy D. Allen<sup>1,\*</sup>

4

5 <sup>1</sup> Institute for Agricultural Biosciences, Oklahoma State University, Ardmore, OK

6 <sup>2</sup> Department of Biochemistry and Molecular Biology, Oklahoma State University, Stillwater, OK

7 <sup>3</sup> Department of Agricultural Botany, Faculty of Agriculture, Cairo University, Giza 12613, Egypt

8

9

10 Tyson C. C. Kerr: [tyson.kerr@okstate.edu](mailto:tyson.kerr@okstate.edu)

11 Haggag Abdel-Mageed: [haggag@okstate.edu](mailto:haggag@okstate.edu)

12 MiYoung Kang: [miyoung.kang@okstate.edu](mailto:miyoung.kang@okstate.edu)

13 Dakota Cryer: [dcryer@okstate.edu](mailto:dcryer@okstate.edu)

14

15 \*Corresponding Author: Randy D. Allen

16 Institute for Agricultural Biosciences

17 Oklahoma State University

18 3210 Sam Noble Parkway

19 Ardmore, Oklahoma 73401

20 randy.allen@okstate.edu

21 580-224-0626

22

23 Submission date:

24 Tables and figures: 1 table, 6 figures; figs. 3 and 6 in color in print and online.

25 Word count:

26 Supplementary data: 4 tables, 2 figures.

27

28

29

30

31

32 **Functional characterization of the *ABF* gene family in upland cotton (*Gossypium hirsutum* L.)**

33

34 Running title: Functional characterization of the *ABFs* from upland cotton

35

36 **Highlight**

37 The *Gossypium hirsutum* *ABF* homeologs are differentially expressed in response to abiotic stress, and  
38 their ectopic expression in *Arabidopsis* can confer increased water deficit tolerance.

39

40 **Abstract**

41 The AREB/ABF bZIP transcription factors play a pivotal role in abscisic acid-dependent abiotic stress-  
42 responsive gene expression. Despite the perennial damage and reduced productivity that result from  
43 water-deficit and unpredictable early season temperature fluctuations, these critical genes have not been  
44 previously examined in upland cotton (*Gossypium hirsutum*). Here, we report the isolation of the *G*  
45 *hirsutum* *ABF* homologs, characterization of their expression patterns in response to abiotic stress  
46 treatments, and examination of their functions through heterologous ectopic expression in *Arabidopsis*.  
47 As expected for an allotetraploid, *G. hirsutum* *ABF* homologs are present in the genome as  
48 homeologous pairs. These genes are differentially expressed, both among the homologs and within the  
49 homeologous pairs, in response to exogenous abscisic acid (ABA) application, dehydration, and  
50 chilling temperatures. Furthermore, heterologous ectopic expression of many of the *G. hirsutum* *ABF*  
51 genes in *Arabidopsis* conferred increased tolerance to water deficit and osmotic stress, as well as cold  
52 tolerance, in a gene specific manner. These results indicate the *G. hirsutum* *ABF* homologs are  
53 functional in *Arabidopsis* and, as in other species, are likely to play an essential role in the abiotic stress  
54 response.

55

56 **Key words:** abiotic stress, abscisic acid, AREB/ABF, cold tolerance, cotton, drought tolerance,  
57 tetraploid

58

59 **Abbreviations:** ABA, ABF, ABRE, AREB

60

## 61 **Introduction**

62 Plants experience damage and reduced productivity as a result of exposure to stressful environmental  
63 conditions including water deficit and temperature extremes (Boyer, 1982; Bray *et al.*, 2000; Wang *et al.*,  
64 *et al.*, 2003). The pernicious effects of abiotic stress are especially problematic in agricultural settings,  
65 where economic viability is dependent on predictable, high yields. Cultivated upland cotton  
66 (*Gossypium hirsutum* L.) is particularly susceptible to these acute effects, as it is grown mainly in arid  
67 or semi-arid regions where rainfall is limited and early and late season temperatures can fluctuate  
68 widely. These conditions make rain-fed production difficult and risky, therefore, more often than not,  
69 irrigation is required to consistently produce profitable yields. With the depletion of groundwater  
70 resources, the diversion of surface water to other uses, and increasingly extreme and unpredictable  
71 temperature fluctuations, the need to understand the mechanisms used by plants, including cotton, to  
72 acclimate to stressful conditions and the development of strategies to optimize these systems in order to  
73 produce varieties that can remain productive with less water, has become a priority.

74  
75 Plants have robust abiotic stress responsive networks that include myriad differentially regulated genes  
76 (Wang *et al.*, 2003; Bartels and Sunkar, 2005; Yoshida *et al.*, 2014). Among these, the abscisic acid  
77 (ABA)-responsive element binding proteins/ABRE-binding factors (AREB/ABFs) have been identified  
78 as essential regulators of the osmotic stress response (Yamaguchi-Shinozaki and Shinozaki 2006; Fujita  
79 *et al.*, 2013; Yoshida *et al.*, 2015). The expression of many of the members of this small sub-family of  
80 transcription factors is induced in response to ABA and various other abiotic stressors, and in turn, they  
81 modulate the expression of downstream target genes that ultimately result in the up-regulation of  
82 abiotic stress-protective factors including membrane and protein stabilizing molecules, antioxidants,  
83 and the accumulation of osmocompatible solutes (Wang *et al.*, 2003; Reddy *et al.*, 2004).

84  
85 As ABA-dependent, bZIP transcription factors, the AREB/ABFs interact with the conserved *cis*-acting  
86 ABA-responsive element (ABRE: PyACGTGG/TC) found in the 5' flanking regions of many ABA  
87 responsive genes (Choi *et al.*, 2000; Kang *et al.*, 2002; Fujii *et al.*, 2009; Yoshida *et al.*, 2010; Yoshida  
88 *et al.*, 2014). Nine AREB/ABF family members have been identified in *Arabidopsis*. Of these, three are  
89 induced by osmotic stress: AREB1/ABF2, AREB2/ABF4, and ABF3; a fourth, ABF1, has been shown to  
90 be a functional homolog (Yoshida *et al.*, 2015). These *Arabidopsis* AREB/ABF paralogs contain the  
91 basic region and the leucine repeats characteristic of the bZIP domain, and five conserved Ser/Thr

92 kinase phosphorylation sites (RXXS/T), that are phosphorylated by SnRK2 protein kinases. Although  
93 many of these *Arabidopsis AREB/ABF* genes are induced by similar abiotic stressors, and their target  
94 genes overlap, each exhibits unique temporal and spatial expression patterns (Choi *et al.*, 2000; Fujita  
95 *et al.*, 2005; Fujii *et al.*, 2009; Fujita *et al.*, 2013; Yoshida *et al.*, 2015).

96  
97 Ectopic over-expression of this subset of genes from the *AREB/ABF* family in *Arabidopsis* has been  
98 shown to confer increased tolerance to various abiotic stressors, as a result of their positive regulation  
99 of ABA signaling (Kim *et al.*, 2004; Fujita *et al.*, 2005; Chinnusamy *et al.*, 2006; Novillo *et al.*, 2007;  
100 Fujii *et al.*, 2009; Yoshida *et al.*, 2010; Medina *et al.*, 2011). These studies show that these AREB/ABF  
101 transcription factors play an essential role in the response to abiotic stress, and thus, have been  
102 extensively examined in model species. Although the endogenous ectopic expression of these  
103 *Arabidopsis AREB/ABF* genes confers increased abiotic stress tolerance, these improvements are often  
104 also accompanied by slower vegetative growth and delayed reproduction.

105  
106 Despite the economic importance of cotton as the world's primary source of natural fiber, accounting  
107 for 40% of all textile fibers produced, the *ABF* gene family has not been fully characterized in *G*  
108 *hirsutum*, the most commonly cultivated cotton species (Wendel and Cronn, 2003; Meyer *et al.*, 2007;  
109 Osakwe, 2009). This is likely due, at least in part, to the allotetraploid nature of the *G. hirsutum* genome  
110 (Wendel & Cronn 2003; Chaudhary *et al.*, 2009). Here, we characterize the *G. hirsutum AREB/ABF*  
111 homologs (hereinafter *GhABFs*), including their expression in response to various abiotic stressors and  
112 their ability to confer improved abiotic stress tolerance when ectopically expressed in *Arabidopsis*.  
113 Furthermore, to address the putative tradeoff between improved stress tolerance and developmental  
114 delay, multiple independent transgenic lines, with various levels of ectopic expression, are evaluated  
115 for each *GhABF* transgenic gene construct to ascertain if there is an acceptable balance of positive and  
116 negative functional effects.

117

## 118 **Materials and methods**

### 119 ***Gossypium ABF* homolog isolation and phylogenetic analysis**

120 *Gossypium arboreum*, *G. hirsutum*, and *G. raimondii* coding sequences were isolated as previously  
121 described (Kerr *et al.* 2017). In brief, a BLAST query of the NCBI EST database was performed using  
122 publicly available *Arabidopsis AREB/ABF* gene coding sequences for similar sequences from *G*

123 *hirsutum* to identify ESTs representing putative homologs. To recover full-length coding sequences,  
124 total RNA from *G. hirsutum* (c.v Coker 312) was extracted using the Spectrum Plant Total RNA kit  
125 (Sigma) and consecutive rounds of RACE-PCR were used to derive the 5' and 3' ends of the target  
126 transcripts using the SMARTer RACE cDNA amplification kit (Clontech). *G. arboreum* and *G.*  
127 *raimondii* ABF coding sequences were derived in a similar fashion for those sequences not found in the  
128 NCBI database. *Populus trichocarpa* orthologs with the highest homology to *Arabidopsis ABF1*,  
129 *AREB1/ABF2*, *ABF3*, and *AREB2/ABF4*, as identified by Ji *et al.* (2013) and *Brassica napus*  
130 *AREB/ABF* orthologs were obtained via BLAST queries of the NCBI database. Coding sequences were  
131 imported into MEGA6.06-mac (Tamura *et al.*, 2013), aligned with ClustalW, and used to generate a  
132 maximum likelihood tree; bootstrapped 250 times. Aligned amino acid sequences were imported into  
133 Jalview 2.9.Ob2 (Waterhouse *et al.*, 2009) for annotation.

134

### 135 **qRT-PCR analysis**

136 *Arabidopsis thaliana* Columbia (Col-0) seeds, sown on solid medium containing half strength MS and  
137 1% sucrose, were placed in the dark for 24 h at 4°C, then transferred to a growth chamber at 24°C with  
138 a 15 h light/9 h dark cycle for three weeks. Samples for basal expression level determination were  
139 taken prior to stress treatments. To measure expression levels in response to exogenous ABA, plants  
140 were sprayed to saturation with a 100 µM ABA solution and sampled 0.5 h, 1 h, and 2 h after  
141 application. To measure the dehydration response, plants were removed from the media, keeping the  
142 roots intact, and sampled after 1.5 h, 3 h, and 6 h. To measure the response to chilling temperatures,  
143 plants were transferred to 4°C, and sampled after 1 h, 2 h, and 4 h. *G. hirsutum* (Coker 312) plants were  
144 grown in soil, in 1 L pots, for six to eight weeks under long-day conditions (15 h light/9 h dark) at  
145 30°C. Following pre-treatment sampling for the determination of basal expression, the plants were  
146 subjected to the following treatments. Plants were sprayed to saturation with a 500 µM ABA solution,  
147 and sampled after 0.5 h, 1 h, and 2 h. Water was withheld, and dehydration stress treatment samples  
148 were taken after 48 h (before visible wilting), 72 h (moderate wilting), and 78 h (severe wilting).  
149 Chilling temperature treatment samples were taken after 1 h, 2 h, and 4 h exposure to 4°C. *Arabidopsis*  
150 RNA was extracted using the RNeasy Mini kit (Qiagen). *G. hirsutum* RNA was extracted using the  
151 Spectrum Plant Total RNA kit (Sigma). All RNA concentrations were quantified via Nanodrop,  
152 normalized to 100 ng/µL, and cDNA synthesis was performed using the iScript cDNA synthesis kit  
153 (Bio-Rad). All qRT-PCR reactions were performed using the iTAQ Universal SYBR Green Supermix

154 (Bio-Rad) in 10  $\mu$ L reactions. Standard curves were derived from pGWB12 plasmid constructs  
155 (described in the following section) containing the *Arabidopsis AREB/ABF* or *G. hirsutum ABF*  
156 homolog coding sequences.

157

### 158 **Generation of transgenic *Arabidopsis* lines**

159 The coding sequences of the *G. hirsutum ABF* genes were amplified in accordance with the pENTR  
160 Directional TOPO Cloning kit (Invitrogen). Half-reactions were used for TOPO cloning, then  
161 transformed into One Shot Chemically Competent *Escherichia coli* (Invitrogen). Plasmids were  
162 purified using the QIAprep Spin Miniprep kit (Qiagen). LR recombination (Invitrogen) was used to  
163 transfer the target sequences to the pGWB12 expression vector (provided by T. Nakagawa, Research  
164 Institute of Molecular Genetics, Shimane University, Matsue, Japan), then transformed into Library  
165 Efficiency DH5- $\alpha$  *E. coli* (Invitrogen). Purified plasmid was transformed into *Agrobacterium*  
166 *tumefaciens* C58, the culture was incubated at 30°C with shaking for 3 h, then plated to solidified LB  
167 supplemented with 10  $\mu$ g mL<sup>-1</sup> gentamicin, 50  $\mu$ g mL<sup>-1</sup> kanamycin, and 50  $\mu$ g mL<sup>-1</sup> rifampicin.  
168 Colonies positive for the insert were cultured for 48 h in 25 mL liquid LB supplemented with 10  $\mu$ g  
169 mL<sup>-1</sup> gentamicin, 50  $\mu$ g mL<sup>-1</sup> kanamycin, and 50  $\mu$ g mL<sup>-1</sup> rifampicin at 30°C with shaking, then  
170 transferred to 250 mL LB for 24 h. Cells were pelleted, then resuspended in a 400 mL 5% sucrose,  
171 0.01% Silwet L-77 solution. Flowering *Arabidopsis* plants were dipped for 20 s with agitation, then  
172 placed under cover in the dark for 24 hours before being transferred to growth conditions at 24 °C with  
173 a 15 hour light/9 hour dark cycle (Clough and Bent, 1998). Harvested seeds were surface sterilized in  
174 30% chlorine bleach and plated on solidified ½ MS media containing 1% sucrose and 50  $\mu$ g mL<sup>-1</sup>  
175 kanamycin. Independent transformed lines were transferred to soil, verified via PCR, and expression  
176 levels were measured using qRT-PCR (as above) for a minimum of ten lines. Three lines, the first  
177 representing a relatively low level of ectopic expression, the second representing the highest level of  
178 ectopic expression of the lines quantified, and the third, representing an approximate average  
179 expression level of the low and high expressing lines (hereinafter “medial”), were selected for further  
180 examination.

181

### 182 **Immunoprecipitation**

183 Immunoprecipitation assays were performed as previously described (Chen *et al.*, 2013) with the  
184 following modifications. Total protein from eight-day-old 35S::FLAG-*GhABF* expressing transgenic

185 *Arabidopsis* seedlings was extracted in immunoprecipitation (IP) buffer (50 mM Tris-HCl (pH 8.1),  
186 150 mM NaCl, 1% NP-40 (v/v), 1 mM EDTA, 5% glycerol, 1mM phenylmethylsulfonyl fluoride, and  
187 protease inhibitor cocktail (1:100)). The protein extracts (1 mg) were precleared by incubation with  
188 Protein A/G beads (Santa Cruz) for 2 h at 4°C, and immunoprecipitated using 20 µl of Anti-FLAG  
189 Affinity Gel (Sigma) at 4°C for 1 h. Beads were washed three times with IP buffer for 20 min each at  
190 4°C. The precipitated proteins were eluted using 2x SDS sample buffer. Eluted samples were subjected  
191 to Western blot analysis using an Anti-FLAG Alkaline Phosphatase antibody (Sigma). Each  
192 experiment was replicated three times.

### 193 194 **Transgenic *Arabidopsis* development and abiotic stress tolerance evaluation**

195 To determine the effects of ectopic expression of the *G. hirsutum* *ABF* homologs in *Arabidopsis* on the  
196 reproductive transition, three to four T<sub>3</sub> generation transgenic plants were grown in soil in 15 ml pots  
197 alongside wild-type (WT) *Arabidopsis*. The reproductive transition, defined by the initiation of bolting,  
198 was monitored for each transgenic line as compared to WT. To measure differential survival following  
199 dehydration, homozygous T<sub>3</sub> and WT seeds were surface sterilized in 30% bleach, plated on ½ MS, 1%  
200 sucrose solid medium, placed in the dark for 24 hours at 4°C, then transferred to a growth chamber at  
201 24°C with a 15 h light/9 h dark cycle for 3 weeks. An average of ten plants from three plates for each  
202 transgenic line and WT were removed from the media and transferred to petri dishes lined with glass  
203 beads to dehydrate. Plants were re-watered, in 30 min intervals, after a minimum of 4 h dehydration, to  
204 a maximum of 6.5 h. Survival was recorded following a 48 h recovery period. Electrolyte leakage, as  
205 the result of low water potential-induced damage, was measured as described by Verslues and Bray  
206 (2004) and van der Weele *et al.* (2000), with minor modifications. Briefly, three-week-old seedlings  
207 were transferred to PEG-infused plates of increasingly negative water potentials (-0.25, -0.50, -0.75,  
208 and -1.25 MPa) for 24 h, rinsed in a mannitol solution of the same water potential, and placed in 5 mL  
209 deionized water for 1 h. Conductivity was measured, the samples were autoclaved, and conductivity  
210 was measured again. Relative electrolyte leakage was calculated by dividing initial conductivity by  
211 conductivity following autoclaving. Each genotype and treatment was replicated three times. To  
212 measure differential survival following exposure to freezing temperatures, T<sub>3</sub> seeds were sown on soil-  
213 filled petri dishes. An average of ten 4 week-old plants per plate were then transferred to a growth  
214 chamber at -7°C. After a minimum of 3 h at -7°C, plates were returned to the growth chamber at  
215 approximately 24°C, at 30 min intervals, to a maximum 5.5 h. Survival was recorded following a 48 h

216 recovery period. Electrolyte leakage as the result of freezing damage was measured as described by  
217 Guo *et al.* (2002) and Ristic and Ashworth (1993), with minor modifications. Briefly, leaves of 4 week  
218 old plants were excised and placed in tubes containing 5 mL deionized water then transferred to a water  
219 bath at 1°C. The temperature was decreased at a rate of 1.5°C h<sup>-1</sup> and samples were removed at -2, -5, -  
220 8, and -11°C, and placed on ice overnight. Following the measurement of initial conductivity, the  
221 samples were autoclaved, conductivity was measured again, and relative electrolyte leakage was  
222 calculated. Each genotype and temperature was replicated three times.

223

## 224 **Results**

### 225 **Isolation and phylogenetic analysis of *GhABF* homologs**

226 The allotetraploid *G. hirsutum* genome is a result of a polyploidy event between A and D genome  
227 *Gossypium* diploid species (Wendel & Cronn, 2003; Chaudhary *et al.*, 2009). Therefore, we expected  
228 that the target *G. hirsutum* *ABF* orthologs would occur in the *G. hirsutum* genome as highly similar,  
229 albeit distinct, homeologous gene pairs. To confirm this hypothesis, we isolated the coding sequences  
230 and portions of the promoter regions of multiple putative *ABF* homologs from *G. hirsutum* and the  
231 diploid *Gossypium* species, *G. arboreum* (A genome) and *G. raimondii* (D genome), and aligned them  
232 with the *Arabidopsis* *AREB/ABF* orthologs (Supplementary Fig. S1). Eight putative polypeptides  
233 encoding *GhABF* orthologs (four homeologous pairs) were derived that contained the conserved basic  
234 region and leucine repeats requisite of the bZIP domain, and the five putative Ser/Thr phosphorylation  
235 sites characteristic of the *Arabidopsis* *AREB/ABFs* (Furihata *et al.*, 2006; Fujii *et al.*, 2009).

236

237 To confirm the homology of these putative *Gossypium* orthologs, we constructed a maximum  
238 likelihood phylogenetic tree (Supplementary Fig. S2) including the isolated *G. arboreum*, *G. hirsutum*,  
239 and *G. raimondii* *ABF* coding sequences, their *Arabidopsis* and *B. napus* orthologs (Rosid II), and the *P.*  
240 *trichocarpa* *AREB/ABF* homologs (Rosid I; Ji *et al.*, 2013). Significant support was found for the  
241 homology of the eight isolated *GhABF* sequences. Each of the Brassicaceae family *AREB/ABF*  
242 sequences resolved in a one-to-one fashion, as did the *G. hirsutum* homeologous pairs with their  
243 corresponding A or D genome diploid *Gossypium* progenitor. However, no one-to-one *AREB/ABF* gene  
244 relationship was found between the Malvaceae (*Gossypium*) and Brassicaceae families, or between the  
245 Rosid I and Rosid II clades. The coding sequences of the *Gossypium* *ABF* homeologous pairs *ABF1*,  
246 *ABF3*, and *ABF4* were found to be more closely related to each other than to the *AREB/ABF* orthologs



247 from any of the other genera examined, and also more closely related to two of the four *AREB/ABF*  
248 homologs from *P. trichocarpa*, rather than the examined species from the Rosid II clade, of which the  
249 genus *Gossypium* is a member. Furthermore, the *Gossypium ABF2* orthologs resolved with the  
250 remaining two Rosid I clade homologs, and were more similar to the *Arabidopsis ABF1*, *ABF3*, and  
251 *AREB2/ABF4* and *Gossypium ABF1*, *ABF3*, and *ABF4* homologs than to the corresponding  
252 *Arabidopsis AREB1/ABF2* homolog. Since no clear one-to-one phylogenetic orthologous relationship  
253 was found between the Malvaceae (*Gossypium*) and Brassicaceae species examined, we opted to label  
254 the isolated *GhABF* homologs based on a combination of their phylogenetic relationships and  
255 similarities to the *Arabidopsis AREB/ABFs* in their expression patterns in response to abiotic stress (as  
256 described in the following section).

257

### 258 **The *AtAREB/ABFs* and *GhABFs* are differentially expressed in response to abiotic stress**

259 The *AREB/ABFs* have been widely reported to be differentially expressed in response to various abiotic  
260 stressors in several plant species (Choi *et al.*, 2000; Fujita *et al.*, 2005; Orellana *et al.*, 2012; Li *et al.*,  
261 2014; Yoshida *et al.*, 2015). Therefore, we used qRT-PCR to measure the expression patterns of the  
262 *Arabidopsis AREB/ABF* and *GhABF* homologs in response to exogenous ABA application, water  
263 deficit, and cold temperature stress (Figs. 1 and 2). Analyses of the *Arabidopsis* homologs was carried  
264 out to provide baseline expression level data to which the *GhABF* expression levels could be compared.  
265 Absolute quantification methods were used to measure transcript copy number so that expression  
266 changes between the different genes could be compared directly. Relative quantification was also  
267 performed to confirm that our results were consistent with previously published data (Choi *et al.*, 2000;  
268 Kim *et al.*, 2004; Fujita *et al.*, 2005; Oh *et al.*, 2005; Yoshida *et al.*, 2015). We found basal expression  
269 levels of the *Arabidopsis AREB/ABFs* ranged from an average low of 10 transcripts per ng total RNA  
270 for *AtABF1*, to 21 and 27 copies for *AtAREB1/ABF2*, and *AtABF3* and *AtAREB2/ABF4*, respectively  
271 (Fig. 1A,C,E). Similar low levels of basal expression were measured for the *GhABF* homologs, ranging  
272 from an average of 2 copies per ng total RNA for *GhABF1D*, to an average of 18 copies for *GhABF2A*  
273 and *GhABF4D* (Fig. 2).

274

275 As previously reported, we found the *Arabidopsis AREB/ABF* homologs were differentially expressed  
276 in response to exogenous ABA and abiotic stress treatments. While expression of each *AtAREB/ABF*  
277 gene was induced, at least to some degree, in response to exogenous ABA application, the magnitude of

278 increase differed substantially. *AtABF1* expression doubled and *AtAREB1/ABF2* expression tripled  
279 relative to basal levels, while the expression of *AtABF3* increased 6 fold and *AtAREB2/ABF4* increased  
280 7 fold (Fig. 1A,B). Similarly, all *Arabidopsis AREB/ABF* genes were induced in response to water  
281 deficit, though *AtABF1* and *AtAREB1/ABF2* transcript levels increased only slightly, while the  
282 *AtAREB2/ABF4* transcript level increased steadily to 20 times its basal level over the 6 h sampling  
283 period, and the *AtABF3* level increased quickly after 3 h to ultimately reach a level 75 fold greater than  
284 the basal level after 6 h (Fig. 1C,D). Though the *AREB/ABFs* genes are primarily associated with the  
285 response to drought via the ABA-dependent pathway (Lee *et al.*, 2010; Fujita *et al.*, 2013; Yoshida *et*  
286 *al.*, 2014), we also examined their expression in response to low temperature stress. The expression of  
287 *AtABF1* and *AtAREB2/ABF4* did not change in response to chilling, however, the *AtAREB1/ABF2*  
288 transcript level increased gradually to 3 times its basal expression over 4 h at 4 °C, and *AtABF3*  
289 expression rose quickly to 6 six times its basal level after 1 h at 4 °C, then declined after the 2 h time  
290 point (Fig. 1E,F).

291  
292 The expression of each *GhABF* homeolog was induced in response to at least one stress treatment,  
293 though the magnitude of induction varied widely between treatments (Fig. 2), and no consistent bias in  
294 expression of the A or D genome was observed. While expression of each of the eight *GhABF*  
295 homologs increased in response to exogenous ABA application, induction of *GhABF3A* was by far the  
296 strongest, rising to a level 30 times its basal expression over the course of the 2 h assay. Expression of  
297 *GhABF3D* and both *GhABF4* homeologs increased more gradually in response to ABA, reaching levels  
298 8 to 10 fold above basal levels, while expression of the *GhABF2* homeologs increased by about 5 fold,  
299 and the *GhABF1* homeologs increased only by about 2 to 3 fold during the 2 h assay (Fig. 2A-D). In  
300 response to water deficit stress, again, *GhABF3A* expression showed the largest increase in transcript  
301 copy number. In addition, the increase in expression of the *GhABF3* homeologs in response to water  
302 deficit treatment began earlier than the other *GhABF* genes, becoming apparent after 48 h, as compared  
303 to 72 h for the *GhABF1*, *GhABF2*, and *GhABF4* homeologous gene pairs (Fig. 2E-H). Furthermore,  
304 both ABA- and drought-induced expression of *GhABF3A* was considerably stronger than that of  
305 *GhABF3D*, illustrating differential expression among these homeologous pairs.

306  
307 Again, while the AREB/ABF bZIP transcription factors are not generally associated with temperature  
308 stress, we found the expression of *AtABF2* and *AtABF3*, and at least one member of each *GhABF*

309 homeologous gene pair, was induced during exposure to low temperature, although the magnitude of  
310 change exhibited by most of these *GhABF* homologs was far less than in the exogenous ABA  
311 application or water deficit treatments (Fig. 2I-L). Transcript levels of most of the *GhABF* genes  
312 induced by low temperature reached a maximum after 1 h at 4 °C, then leveled off or dropped back to  
313 near basal levels over the duration of the treatment. *GhABF1A*, which showed a relatively weak  
314 response to ABA or water deficit stress, was the most strongly induced *GhABF* homolog in response to  
315 low temperature, increasing from single digit levels to more than 100 copies per ng total RNA within 1  
316 h, before returning to near basal levels after 4 h. Expression of *GhABF4D* also increased considerably  
317 in response to chilling stress, and like *GhABF1A*, expression returned to near basal levels after 4 h.  
318

### 319 **Generation of *GhABF* expressing transgenic *Arabidopsis* lines**

320 In order to characterize the functions of the individual *GhABF* homeologs and test the impact of their  
321 ectopic expression on development and abiotic stress tolerance, we generated independent transgenic  
322 *Arabidopsis* lines that ectopically express each of the eight isolated *GhABF* genes, under the control of  
323 the constitutive CaMV 35S promoter. The ectopic expression levels of a minimum of ten independent  
324 *Arabidopsis* lines for each gene construct were quantified, and three lines for each were selected for  
325 phenotypic examination. These transgenic lines were selected as per the following criteria: 1) the line  
326 with the lowest measurable ectopic expression level, 2) the line with the highest measured ectopic  
327 expression level, and 3) a line with an ectopic expression level approximating the midpoint between the  
328 high and low expressing lines for each gene construct (Table1). Each of these three selected lines, from  
329 each of the eight *GhABF* gene constructs, were subsequently evaluated, in parallel, for differences in  
330 growth and development, and their ability to tolerate drought and low temperature stress.

331

332 Although the same binary vector and CaMV35S promoter were used in the generation of all gene  
333 constructs, we found substantial differences in the levels of constitutive ectopic expression among the  
334 independent transgenic *Arabidopsis* lines. Wide variation in the range of event-specific expression was  
335 seen between the transgenic lines expressing the individual *GhABF* orthologs and, in some cases,  
336 between the lines expressing the A or D genome-derived homeologs (Table 1). For example, the high-  
337 expressing lines containing the transgenes that encode the GhABF2 A and D genome homeologs had  
338 similar levels of expression, averaging 455 transcripts per ng total RNA, while the *GhABF2A*-  
339 expressing lines showed little event-specific variability, with less than a 2-fold difference detected

340 between the highest and lowest expressing lines, in contrast to the difference between highest and  
341 lowest expressing *GhABF2D* lines, which was nearly 16-fold. Greater event-specific variation in  
342 expression was seen in the *GhABF3* homeolog expressing lines, with the selected *GhABF3A* lines  
343 ranging from a low of 175 transcripts per ng total RNA to a high of 6383 transcripts per ng total RNA,  
344 a 36-fold difference, while the overall expression difference among the *GhABF3D* lines was  
345 approximately 1/10<sup>th</sup> the level of the *GhABF3A* lines, ranging from 17 to 770 transcripts per ng total  
346 RNA, a 45-fold difference from lowest to highest. Even more substantial differences in expression  
347 between the paired homeologs was seen among the *GhABF4* lines, with the expression of the  
348 *GhABF4A* lines ranging from 224 to 1563 transcripts per ng RNA (a 7-fold difference), while  
349 expression levels in the *GhABF4D* lines were far lower, ranging from 22 to 63 transcripts per ng RNA,  
350 a difference of only about 3-fold. Thus, in addition to the expected event-specific variation in  
351 transgene expression that is typically attributed to position effects associated with the insertion site,  
352 substantial gene-specific differences in mRNA accumulation are also apparent.

353

#### 354 ***GhABF* protein expression is largely independent of transcript level**

355 To better understand the patterns of ectopic *G. hirsutum* *ABF* expression in *Arabidopsis* and determine  
356 the effects of ABA on *ABF* accumulation (Chen *et al.*, 2013) we examined FLAG-*GhABF* fusion  
357 protein accumulation in the selected *GhABF D* genome expressing transgenic *Arabidopsis* lines with or  
358 without ABA treatment (Fig. 3). Ectopic *GhABF* protein expression was not detected in crude protein  
359 extracts from any of our transgenic lines by Western blot analysis but specific bands were detectable  
360 after enrichment by immunoprecipitation. Unlike the wide variation in transcript expression levels,  
361 relatively little variation in *G. hirsutum* *ABF* protein accumulation was seen between the low, median,  
362 and high transcript expressing *GhABF2D* or *GhABF4D* transgenic *Arabidopsis* lines without ABA  
363 treatment and these levels did not change in response to ABA. In contrast, *GhABF3D* protein levels  
364 were nearly undetectable in immunoprecipitated samples taken from plants without ABA treatment but,  
365 after ABA treatment, the protein accumulated to substantially higher levels and clear differences were  
366 seen between the low, median, and high expressing lines. Thus, it appears that the steady state levels of  
367 the *GhABF* proteins in plants that express *GhABF2D* and *GhABF4D* are relatively stable and largely  
368 independent of transcript levels or ABA treatment. On the other hand, accumulation of *GhABF3D*  
369 appears to be under ABA-dependent post-transcriptional regulation.

370

### 371 **Ectopic *GhABF* expression can delay the reproductive transition**

372 Previous studies have shown that endogenous ectopic expression of *Arabidopsis AREB/ABFs* delays  
373 growth and the reproductive transition (Kang *et al.*, 2002; Kim *et al.*, 2004; Fujita *et al.*, 2005). To  
374 determine if ectopic *GhABF* gene expression in *Arabidopsis* affects development, selected transgenic  
375 lines were grown alongside wild type and monitored for differences in the reproductive transition,  
376 defined by the initiation of bolting (Fig. 4). None of the *GhABF1A* or *GhABF1D* expressing lines  
377 examined differed significantly from wild type plants; however, the majority of the *GhABF2*, *GhABF3*,  
378 and *GhABF4* transgenic *Arabidopsis* lines exhibited significant delays in reproductive transition (Fig.  
379 4B). Except for the *GhABF1* expressing lines, the reproductive transition delay was most severe the  
380 lines that express the highest ectopic levels of the *GhABF* transcripts, indicating a relationship between  
381 expression level and reproductive delay. For example, while *GhABF2D* lines showed some line to line  
382 variation in mRNA expression, the level of *GhABF2D* protein was relatively stable and this is reflected  
383 in a limited range of developmental delay phenotypes. Likewise, expression of *GhABF4D* mRNA was  
384 low but protein accumulation in these lines was relatively high and stable, which corresponds with the  
385 strong developmental delay in all three lines. On the other hand, *GhABF3D* lines showed strong  
386 variation in expression at the mRNA level and, following ABA treatment, at the protein level. Thus,  
387 not unexpectedly, the severity of developmental delay in *GhABF* expressing *Arabidopsis* plants appears  
388 to correlate more closely with *GhABF* transgene expression at the protein level than at the mRNA level.  
389

### 390 **Ectopic *GhABF* expression can improve tolerance to water deficit and osmotic stress**

391 To determine if ectopic *GhABF* expression in *Arabidopsis* confers improved water deficit tolerance, we  
392 quantified the survival of the selected *GhABF* expressing transgenic *Arabidopsis* lines, as compared to  
393 wild type, following dehydration treatment (Fig. 5A). Substantial differences in survival were apparent  
394 between the wild type and transgenic plants after approximately 5.5 h dehydration, and these  
395 differences became more pronounced after 6 h (Fig. 5A; Supplementary Table S1). The percent of  
396 surviving plants corresponded with ectopic expression level in the majority of the *GhABF*-expressing  
397 lines, with the strongest protective effects seen in the high expressing lines for most gene constructs.  
398 Notable exceptions to this trend were seen in the *GhABF4* expressing plants, which showed similar  
399 survival rates at all expression levels. While survival of the *GhABF4A* plants was not substantially  
400 higher than wild type despite relatively high levels of ectopic expression, *GhABF4D* lines showed  
401 significantly improved survival that correlated more closely with the expression at the protein level.

402 The most substantial increase in water deficit tolerance was seen in the high *GhABF3D* line, which  
403 showed 71% survival over wild type after 6 h dehydration treatment, and correlated most closely with  
404 protein expression levels after ABA treatment.

405

406 To corroborate the dehydration survival assay results with osmotic stress, each of the *GhABF*-  
407 expressing lines were subjected to increasingly negative water potentials, and the percent electrolyte  
408 leakage was measured (Fig. 5B, Supplementary Table S2). Ectopic expression of the *GhABF* homologs  
409 resulted in reduced electrolyte leakage in nearly all of the lines and, in the majority of the transgenic  
410 lines, reduced electrolyte leakage following osmotic stress corresponded with increased plant survival  
411 following dehydration. With the exception of the *GhABF1A* and *GhABF2D* lines, the highest  
412 expressing lines showed the lowest levels of electrolyte leakage. However, this trend was not  
413 proportional to the dehydration survival results in all cases. For example, all of the *GhABF3A*  
414 expressing lines showed substantially reduced membrane damage, which contrasts with the plant  
415 survival assay, in which the low and medial expressing lines performed similarly to wild type.  
416 Likewise, the *GhABF4A* and *GhABF4D* transgenic lines examined exhibited similar survival rates (by  
417 homeolog) regardless of expression level, but lines with increasing levels of ectopic expression showed  
418 incremental reductions in electrolyte leakage. The *GhABF3D* lines, on the other hand, showed both  
419 substantial increases in survival and substantial reductions in electrolyte leakage corresponding most  
420 closely to the level of ectopic expression at the protein level.

421

422 Overall, these results indicate that ectopic expression of each of the *GhABF* homologs in *Arabidopsis*  
423 resulted in protective effects in at least one of the assays used and the magnitude of stress protection  
424 was related to transgene expression level in the *GhABF1*, *GhABF2*, and *GhABF3* expressing lines.  
425 However, in the *GhABF4* expressing lines, little correlation was evident between transgene expression  
426 level and stress protection in the dehydration survival assay, where the highest expressing *GhABF4A*  
427 line, which had transcript levels approximately 25-times higher than highest expressing the *GhABF4D*  
428 line, was much more sensitive to dehydration stress. However, as shown in Fig 3, *GhABF4D* plants  
429 accumulate relatively high levels of *GhABF4D* protein, in spite of showing relatively low levels of  
430 mRNA.

431

432 **Ectopic *GhABF* expression can improve cold tolerance, in a gene dependent manner**

433 Although the *AREB/ABFs* are generally associated with the osmotic stress response, some studies  
434 indicated they can also influence cold responses, directly or indirectly, via crosstalk with cold-  
435 responsive signaling pathways (Choi *et al.*, 2000; Oh *et al.*, 2005; Lee *et al.*, 2010; Fujita *et al.*, 2011).  
436 Therefore, to determine if ectopic *GhABF* gene expression in *Arabidopsis* has an effect on cold  
437 tolerance, we analyzed survival following exposure to  $-7^{\circ}\text{C}$  over the course of 5 h (Fig. 6A;  
438 Supplementary Table S3), and electrolyte leakage (Fig. 6B, Supplementary Table S4) in response to  
439 progressively lower freezing temperatures.

440

441 Unlike the water deficit tolerance assays where the protective effects were associated with expression  
442 level, the effects of ectopic expression of the *GhABF* homologs in *Arabidopsis* on freezing temperature  
443 survival were gene-specific and largely independent of expression at the mRNA level (Fig. 6A). For  
444 example, all of the transgenic *Arabidopsis* lines expressing either the *GhABF1* or *GhABF4* homeologs  
445 showed significant increases in survival following exposure to  $-7^{\circ}\text{C}$  as compared to the wild type  
446 plants. However, the ectopic expression of the *GhABF2A* and *GhABF3A* appeared to have negative  
447 effects on freezing tolerance, and only plants that expressed high levels of *GhABF2D* or *GhABF3D*  
448 showed increased survival compared to wild type plants.

449

450 Similar to the water deficit stress assays, lower levels of electrolyte leakage following exposure to  
451 freezing temperatures generally correlated with increased plant survival (Fig. 6B). Relative to wild type  
452 plants, the percent of electrolyte leakage measured for all *GhABF1* and *GhABF4* lines examined was  
453 substantially reduced, indicating enhanced cellular tolerance to freezing temperatures. Conversely,  
454 expression of *GhABF2A*, *GhABF2A*, and *GhABF3A* appeared to result in significant increases in  
455 electrolyte leakage after freezing treatment, relative to the wild type plants. Although plants of the high  
456 expressing *GhABF2D* line showed a small but significant increase in survival, electrolyte leakage assay  
457 results show that these plants suffered membrane damage similar to the wild type plants. High  
458 expressing *GhABF3A* line and the low and medial expressing *GhABF2A* lines showed both reduced  
459 survival and increased electrolyte leakage after exposure to freezing temperatures, indicating that  
460 freezing tolerance in these plants is likely to be reduced. In summary, ectopic expression of either of  
461 the *GhABF1A*, *GhABF1D*, and *GhABF4D* homeologs in *Arabidopsis* conferred increased tolerance to  
462 freezing temperatures while expression of *GhABF2A* or *GhABF3* homeologs appears to compromise  
463 freezing tolerance.

464

## 465 **Discussion**

466 To determine the functional roles of the *GhABF* orthologs, we examined their expression patterns in  
467 response to various abiotic stressors in cotton and evaluated their effects on development and abiotic  
468 stress tolerance by ectopically expressing each in *Arabidopsis*. Since *G. hirsutum* is an allotetraploid  
469 species, we anticipated that each *GhABF* ortholog would be present in the cotton genome as a  
470 homeologous pair of genes with very similar coding sequences. Eight *GhABF* coding sequences were  
471 isolated, each encoding a putative polypeptide that contains the defining features of the *Arabidopsis*  
472 AREB/ABF proteins, namely, a canonical bZIP domain, and five Ser/Thr kinase phosphorylation sites  
473 (Furihata *et al.*, 2006; Fujii *et al.*, 2009). In order to directly compare the expression characteristics of  
474 the individual *GhABF* genes to one another and to the AREB/ABF homologs from *Arabidopsis*,  
475 absolute quantification methods were used to determine the number of transcript copies present in total  
476 RNA samples. Furthermore, since the responses of the *Arabidopsis* AREB/ABFs to cold stress have  
477 only been analyzed in a few cases (Choi *et al.*, 2000; Lee *et al.*, 2005), we assayed the expression of  
478 these gene in response to low temperatures, in addition to exogenous ABA application and water  
479 deficit. We found both the *Arabidopsis* AREB/ABF and *GhABF* genes had low levels of basal  
480 expression, and each gene was differentially responsive to the various abiotic stress treatments.

481

482 In *Arabidopsis*, expression of *AtABF3* is the most responsive to water deficit, chilling temperatures and,  
483 along with *AtABF4*, to ABA treatment, while in *G. hirsutum*, expression of the *GhABF3A* is the most  
484 highly responsive homeolog to water deficit and ABA treatment, and *GhABF1A* is most responsive to  
485 chilling. These differential expression patterns within the *G. hirsutum* homeologous pairs could  
486 indicate sub-functionalization or silencing of one or the other homeolog due to redundancy. For  
487 example, expression of *GhABF1* homeologs was only modestly responsive to exogenous ABA or  
488 dehydration, and the *GhABF4* genes exhibit only a slight induction in response to dehydration,  
489 however, *GhABF1A* and *GhABF4D* are strongly induced in response to chilling, while expression of  
490 *GhABF1D* responds relatively weakly to chilling and *GhABF4A* does not respond at all. This increased  
491 expression in response to chilling stress could result from cross-talk due to functional interactions  
492 between the ABA-dependent and ABA-independent stress response pathways (Yoshida *et al.*, 2014).  
493 For example, *Arabidopsis* AREB1/ABF2 interacts with various AP2 domain proteins, including  
494 DREB1A, also known as CBF3, an essential component of the low temperature stress response (Lee *et*



495 *al.*, 2010, Zhou *et al.*, 2011).

496

497 While ectopic expression of *AREB/ABF* genes may confer increased stress tolerance, these  
498 improvements are often accompanied by delayed growth or reproduction (Kang *et al.*, 2002; Kim *et al.*,  
499 2004; Fujita *et al.*, 2005). Therefore, we analyzed the ability of the *GhABFs* to confer increased stress  
500 tolerance and affect development when ectopically expressed in *Arabidopsis*. Tradeoffs between stress  
501 tolerance and developmental delay were seen with some, but not all, *GhABF* genes, raising the  
502 possibility that negative side-effects on growth and development associated with increased *AREB/ABF*  
503 expression may be gene-specific and it might be possible to mitigate unwanted negative effects by  
504 using transgenes that encode specific *ABF* orthologs and selecting transgenic lines with varying levels  
505 of ectopic expression. In this way, it may be possible to find an acceptable balance between positive  
506 and negative phenotypes. Therefore, three independent lines with high, low, and medial levels of  
507 ectopic expression were selected for each of the eight *GhABF* gene constructs for physiological  
508 examination. Although the gene constructs differed only in their coding sequences, transgene  
509 expression levels varied widely among the different *GhABF* gene constructs. For example, the highest  
510 expressing *GhABF3A* line accumulated more than 6300 transcript copies/ng of total RNA and the  
511 medial expressing line had higher transcript levels than the highest expressing line of any of the other  
512 constructs. On the other hand, the highest expressing *GhABF4D* line produced only 63 copies/ng,  
513 1/100<sup>th</sup> of the level seen in the high expressing *GhABF3A* line. Yet, these transgenic lines showed  
514 similar dehydration stress tolerance phenotypes and the *GhABF4D* line flowered later and showed  
515 stronger cold tolerance than the high expressing *GhABF3A* line.

516

517 The large transgene-specific and event-specific differences in the steady-state levels of the ectopic  
518 *GhABF* transcripts in plants of various transgenic lines does not seem to correspond well with the stress  
519 tolerance phenotypes of these lines. A possible explanation for this paradox becomes apparent when  
520 protein expression levels are considered. Regardless of the level of mRNA expression, only a very  
521 small amount of *GhABF* protein accumulates in any of the transgenic *Arabidopsis* plants, as indicated  
522 by the requirement for immunoprecipitation to allow detection. This suggests that accumulation of  
523 *GhABF* gene products is under strong post-transcriptional regulation. Chen *et al.* (2013) reported that  
524 *AtABF1* and *AtABF3* turnover rapidly in the absence of ABA, and degradation is slowed when the  
525 plants are pre-treated with ABA and our results indicate that accumulation of *GhABF3D* is ABA

526 dependent. Thus, ABA appears to play a role in both the transcriptional and post-transcriptional  
527 regulation of some AREB/ABFs in both *Arabidopsis* and *G. hirsutum*, while protein accumulation in  
528 *GhABF2D* and *GhABF3D* lines appears to be relatively insensitive to the levels of mRNA and does not  
529 respond to ABA treatment.

530

531 The effect of ectopic *GhABF* gene expression on cold tolerance in *Arabidopsis* follows a different  
532 pattern to that observed for developmental delay and dehydration tolerance. There are few apparent  
533 intragenic or intergenic expression level effects, in fact, the cold tolerance phenotype of the low  
534 expressing *GhABF4D* lines is stronger than the much more highly expressed *GhABF4A* lines. However,  
535 as with the other characteristics, expression of genes within the homeologous gene pairs generally  
536 show similar phenotypes. Interestingly, all *GhABF1A* and *GhABF1D* expressing lines showed  
537 substantially increased cold tolerance but no reproductive delay, while the improved cold tolerance of  
538 *GhABF4A* and *GhABF4D* expressing lines was associated with severe reproductive delays.

539

540 Though possible, it seems unlikely that the large gene-specific differences in transcript abundance  
541 result from position effects associated with the stochastic insertion of transgenes into the *Arabidopsis*  
542 genome. It seems more probable that the differences in maximal transgene expression are due to the  
543 characteristics of the individual *G. hirsutum* *ABF* coding sequences. These differences could affect  
544 transcription, but it is more likely that they affect transcript stability. For example, the attenuating  
545 effects of microRNA (miRNA) could differentially affect the accumulation of *GhABF* mRNA from  
546 different transgenes. To examine this possibility, the coding sequences of the eight *G. hirsutum* *ABF*  
547 homologs were used to query the *Arabidopsis* miRNA collection in miRBase. Between two and five  
548 potential miRNA target sites were found within the coding sequences for the all of the *G. hirsutum*  
549 *ABFs*, with the exception of the *GhABF3* homeologs, for which no putative target sites were found.  
550 This observation raises the possibility that the high levels of ectopic expression of the *GhABF3*  
551 homeologs in transgenic *Arabidopsis* lines could be associated with differential sensitivity to miRNA-  
552 dependent transcript destabilization. On the other hand, a unique potential miRNA target site was  
553 detected in the *GhABF4D* coding sequence, which might explain its low expression. Interestingly, this  
554 miRNA was reported to target transcripts for a MYB transcription factor that interacts with a class of  
555 ABRE elements in the promoter of the stress responsive *RD22* gene of *Arabidopsis* (Choi *et al.*, 2000).  
556 The possible direct or indirect effects of this or other miRNAs on *GhABF* transcript stability remain to

557 be investigated.

558

559 Overall, our results indicate the isolated *GhABF* homologs encode functional transcription factors that  
560 are likely to play important roles in the regulation of abiotic stress tolerance in cotton. Each homeolog  
561 is differentially expressed in response to various abiotic stressors, and the ectopic expression of the  
562 majority of these genes confers some degree of increased tolerance to drought or cold stress in  
563 *Arabidopsis*. Keeping in mind that these results represent phenotypic analyses of transgenic  
564 *Arabidopsis* plants that ectopically express cotton *ABF* genes, it is clear that *GhABF3* genes are  
565 induced by ABA and dehydration at both the transcriptional and post-transcriptional levels, and  
566 together with the *GhABF4* genes, may be critical for controlling cellular responses to water deficit in  
567 cotton. Likewise, since ectopic expression of the *GhABF1* and *GhABF4* homeologs provides  
568 substantial increases in cold tolerance in *Arabidopsis*, it seems possible that these factors may also be  
569 important for the regulation of cold responsive gene expression in cotton. These data provide a  
570 tentative roadmap toward informed decisions regarding the selection of genes for the development of  
571 transgenic plants aimed at improving abiotic stress tolerance. However, further functional analyses of  
572 the expression of these transgenes in other species, including cotton, will be necessary to confirm these  
573 preliminary conclusions.

574

575 **Supplementary data**

576 **Table S1.** Percent survival of selected *GhABF* expressing transgenic *Arabidopsis* lines after 5.5 and 6 h  
577 dehydration.

578 **Table S2.** Electrolyte leakage (%) of selected *GhABF* expressing transgenic *Arabidopsis* lines in  
579 response to increasingly negative water potentials

580 **Table S3.** Percent survival of selected *GhABF* expressing transgenic *Arabidopsis* lines after 4.5 and 5  
581 hours at -7° C.

582 **Table S4.** Electrolyte leakage (%) of selected *GhABF* expressing transgenic *Arabidopsis* lines in  
583 response to increasingly negative temperatures.

584 **Fig. S1.** Multiple sequence alignment of the *Arabidopsis* AREB/ABFs and *GhABFs*.

585 **Fig. S2.** Maximum likelihood tree of select AREB/ABF subfamily members.

586

587 **Acknowledgments**

588 The authors thank Drs. Mohamed Fokar, Miyoung Kang, and Paxton Payton for experimental  
589 consultation and critical reviews of the manuscript. We also thank Drs. Andrew Doust, Million Tadege,  
590 and Ramanjulu Sunkar for helpful discussions. This work was supported by grants from Cotton  
591 Incorporated and the Samuel Roberts Noble Foundation to RDA, along with additional support from  
592 the Walter R. Sitlington Endowment, the Oklahoma Agricultural Experiment Station, and the  
593 Department of Biochemistry and Molecular Biology, Oklahoma State University.

594 **References**

- 595 **Bartels D, Sunkar R.** 2005. Drought and salt tolerance in plants. *Critical Reviews in Plant Sciences*  
596 **24**, 23-58.
- 597 **Boyer JS.** 1982. Plant productivity and environment. *Science* **218**, 443-448.
- 598 **Bray EA, Bailey-Serres J, Weretilnyk E.** 2000. Responses to abiotic stresses. In: Buchanan BB,  
599 Gruissem W, Jones, RL, eds. *Biochemistry and Molecular Biology of Plants*. Rockville, Maryland:  
600 American Society of Plant Physiologists, 1158-1249.
- 601 **Chaudry B, Hovav R, Flagel L, Mittler R, Wendel JF.** 2009. Parallel expression evolution of  
602 oxidative stress-related genes in fiber from wild and domesticated diploid and polyploid cotton  
603 (*Gossypium*). *BMC Genomics* **10**, 378-390.
- 604 **Chinnusamy V, Zhu J, Zhu JK.** 2006. Gene regulation during cold acclimation in plants. *Physiologia*  
605 *Plantarum* **126**, 52-61.
- 606 **Choi HI, Hong JH, Ha JO, Kang JY, Kim SY.** 2000. ABFs, a family of ABA-responsive element  
607 binding factors. *Journal of Biological Chemistry* **275**, 1723-1730.
- 608 **Clough SJ, Bent AF.** 1998. Floral dip: a simplified method for *Agrobacterium*- mediated  
609 transformation of *Arabidopsis thaliana*. *The Plant Journal* **16**, 735-743.
- 610 **Fujii H, Chinnusamy V, Rodrigues A, Rubio S, Antoni R, Park S, Cutler SR, Sheen J, Rodriguez**  
611 **PL, Zhu, J.** 2009. In vitro reconstitution of an abscisic acid signalling pathway. *Nature* **462**, 660-664.
- 612 **Fujita Y, Fujita M, Satoh R, Maruyama K, Parvez MM, Seki M, Hiratsu K, Ohme-Takagi M,**  
613 **Shinozaki K, Yamaguchi-Shinozaki, K.** 2005. AREB1 is a transcription activator of novel ABRE-  
614 dependent ABA signaling that enhances drought stress tolerance in *Arabidopsis*. *The Plant Cell* **17**,  
615 3470-3488.
- 616 **Fujita Y, Yoshida T, Yamaguchi-Shinozaki K.** 2013. Pivotal role of the AREB/ABF-SnRK2 pathway  
617 in ABRE-mediated transcription in response to osmotic stress in plants. *Physiologia Plantarum* **147**, 15-  
618 27.
- 619 **Furihata T, Maruyama K, Fujita Y, Umezawa T, Yoshida R, Shinozaki K, Yamaguchi-Shinozaki**  
620 **K.** 2006. Abscisic acid-dependent multisite phosphorylation regulates the activity of a transcription  
621 activator AREB1. *Proceedings of the National Academy of Sciences USA* **103**, 1988-1993.
- 622 **Guo Y, Xiong L, Ishitani M, Zhu J.** 2002. An *Arabidopsis* mutation in translation elongation factor 2  
623 causes superinduction of CBF/DREB1 transcription factor genes but blocks the induction of their  
624 downstream targets under low temperature. *Proceedings of the National Academy of Sciences USA* **99**,

- 625 7786-7791.
- 626 **Ji L, Wang J, Ye M, Li Y, Guo B, Chen Z, Li H, An X.** 2013. Identification and characterization of  
627 the *Populus* AREB/ABF subfamily. *Journal of Integrative Plant Biology* **55**, 177-186.
- 628 **Kang JY, Choi HI, Im MY, Kim SY.** 2002. *Arabidopsis* basic leucine zipper proteins that mediate  
629 stress-responsive abscisic acid signaling. *The Plant Cell* **14**, 343-357.
- 630 **Kerr TCC, Abdel-Mageed H, Alemant L, Lee J, Payton P, Cryer D, Allen AD.** 2017. Ectopic  
631 expression of two *AREB/ABF* orthologs increases drought tolerance in cotton (*Gossypium hirsutum*).  
632 *Plant, Cell and Environment* doi: 10.1111/pce.12906
- 633 **Kim S, Kang JY, Cho DI, Park JH, Kim SY.** 2004. ABF2, an ABRE-binding bZIP factor, is an  
634 essential component of glucose signaling and its overexpression affects multiple stress tolerance. *The*  
635 *Plant Journal* **40**, 75-87.
- 636 **Lee B, Henderson DA, Zhu J.** 2005. The *Arabidopsis* cold-responsive transcriptome and its regulation  
637 by ICE1. *The Plant Cell* **17**, 3155-3175.
- 638 **Lee SJ, Kang JY, Park HJ, Kim MD, Bae MS, Choi HI, Kim SY.** 2010. DREB2C interacts with  
639 ABF2, a bZIP protein regulating abscisic acid-responsive gene expression, and its overexpression  
640 affects abscisic acid sensitivity. *Plant Physiology* **153**, 716-727.
- 641 **Li C, Yue J, Wu X, Xu C, Yu J.** 2014. An ABA-responsive DRE-binding protein gene from *Setaria*  
642 *italica*, SiARDP, the target gene of SiAREB, plays a critical role under drought stress. *Journal of*  
643 *Experimental Botany* **65**, 5415-5427.
- 644 **Medina J, Catalá R, Salinas J.** 2011. The CBFs: three *Arabidopsis* transcription factors to cold  
645 acclimate. *Plant Science* **180**, 3-11.
- 646 **Novillo F, Medina J, Salinas J.** 2007. *Arabidopsis* CBF1 and CBF3 have a different function than  
647 CBF2 in cold acclimation and define different gene classes in the CBF regulon. *Proceedings of the*  
648 *National Academy of Sciences USA* **104**, 21002-21007.
- 649 **Oh S, Song SI, Kim YS, Jang H, Kim SY, Kim M, Kim Y, Nahm BH, Kim J.** 2005 *Arabidopsis*  
650 CBF3/DREB1A and ABF3 in transgenic rice increased tolerance to abiotic stress without stunting  
651 growth. *Plant Physiology* **138**, 341-351.
- 652 **Orellana S, Yanez M, Espinoza A, Verdugo I, Gonzalez E, Ruiz-Lara S, Casaretto JA.** 2010. The  
653 transcription factor SlAREB1 confers drought, salt stress tolerance and regulates biotic and abiotic  
654 stress-related genes in tomato. *Plant, Cell & Environment* **33**, 2191-2208.
- 655 **Osakwe E.** 2009. Cotton Fact Sheet India. International Cotton Advisory Committee.

- 656 **Reddy AR, Chaitanya KV, Vivekanandan M.** 2004. Drought-induced responses of photosynthesis  
657 and antioxidant metabolism in higher plants. *Journal of Plant Physiology* **161**, 1189-1202.
- 658 **Ristic Z, Ashworth EN.** 1993. Changes in leaf ultrastructure and carbohydrates in *Arabidopsis*  
659 *thaliana* (Heynh) cv. Columbia during rapid cold acclimation. *Protoplasma* **172**, 111-123.
- 660 **Tamura K, Stecher G, Peterson D, Filipinski A, Kumar S.** 2013. MEGA6: Molecular Evolutionary  
661 Genetics Analysis Version 6.0. *Molecular Biology and Evolution* **30**, 2725-2729.
- 662 **van der Weele CM, Spollen WG, Sharp RE, Baskin TI.** 2000. Growth of *Arabidopsis thaliana*  
663 seedlings under water deficit studied by control of water potential in nutrient-agar media. *Journal of*  
664 *Experimental Biology* **51**, 1555-1562.
- 665 **Verslues PE, Bray EA.** 2004. *LWR1* and *LWR2* are required for osmoregulation and osmotic  
666 adjustment in *Arabidopsis*. *Plant Physiology* **136**, 2831-2842.
- 667 **Wang W, Vinocur B, Altman A.** 2003. Plant responses to drought, salinity and extreme temperatures:  
668 towards genetic engineering for stress tolerance. *Planta* **218**, 1-14.
- 669 **Waterhouse AM, Procter JB, Martin DMA, Clamp M, Barton GJ.** 2009. Jalview Version 2: a  
670 multiple-sequence alignment editor and analysis workbench. *Bioinformatics* **25**, 1189-1191.
- 671 **Wendel JF, Cronn RC.** 2003. Polyploidy and the evolutionary history of cotton. *Advances in*  
672 *Agronomy* **78**, 139-186.
- 673 **Yamaguchi-Shinozaki K, Shinozaki K.** 2006. Transcriptional regulatory networks in cellular  
674 responses and tolerance to dehydration and cold stresses. *Annual Review of Plant Biology* **57**, 781-803.
- 675 **Yoshida T, Fujita Y, Sayama H, Kidokoro S, Maruyama K, Mizoi J, Shinozaki K, Yamaguchi-**  
676 **Shinozaki, K.** 2010. AREB1, AREB2, and ABF3 are master transcription factors that cooperatively  
677 regulate ABRE-dependent ABA signaling involved in drought stress tolerance and require ABA for full  
678 activation. *The Plant Journal* **61**, 672-685.
- 679 **Yoshida T, Mogami J, Yamaguchi-Shinozaki, K.** 2014. ABA-dependent and ABA-independent  
680 signaling in response to osmotic stress in plants. *Current Opinion in Plant Biology* **21**, 133-139.
- 681 **Yoshida T, Fujita Y, Maruyama K, Mogami J, Todaka D, Shinozaki K, Yamaguchi-Shinozaki K.**  
682 .2015. Four *Arabidopsis* AREB/ABF transcription factors function predominantly in gene expression  
683 downstream of SnRK2 kinases in abscisic acid signaling in response to osmotic stress. *Plant, Cell &*  
684 *Environment* **38**, 35-49.
- 685 **Zhou MQ, Shen C, Wu LH, Tang KX, Lin J.** 2011. CBF-dependent signaling pathway: a key  
686 responder to low temperature stress in plants. *Critical Reviews in Biotechnology* **31**, 186-192.
- 687

688 **Table 1.** Transcript copy number per ng total RNA and relative expression of selected *GhABF*  
 689 expressing transgenic *Arabidopsis* lines used for phenotypic and abiotic stress tolerance evaluation.  
 690 Lines selected represent a relatively low level of ectopic expression, the highest level of ectopic  
 691 expression of the lines quantified, and an approximate average expression level of the low and high  
 692 expressing lines. Data are means of three biological replicates and three technical replicates  $\pm$  SD.

| <i>Gh</i> homolog | Selected line # | Transcripts / ng total RNA | Relative expression |
|-------------------|-----------------|----------------------------|---------------------|
| <i>ABF1A</i>      | 4               | 6.5 $\pm$ 1.21             | 1.0 $\pm$ 0.24      |
|                   | 3               | 144.7 $\pm$ 25.44          | 16.4 $\pm$ 0.27     |
|                   | 6               | 220.1 $\pm$ 52.01          | 23.9 $\pm$ 0.31     |
| <i>ABF1D</i>      | 6               | 19.6 $\pm$ 1.39            | 1.0 $\pm$ 0.11      |
|                   | 2               | 121.0 $\pm$ 37.01          | 5.7 $\pm$ 0.41      |
|                   | 5               | 309.7 $\pm$ 58.59          | 13.9 $\pm$ 0.25     |
| <i>ABF2A</i>      | 3               | 287.3 $\pm$ 6.29           | 1.0 $\pm$ 0.03      |
|                   | 5               | 372.8 $\pm$ 41.11          | 1.3 $\pm$ 0.15      |
|                   | 9               | 489.7 $\pm$ 41.33          | 1.7 $\pm$ 0.11      |
| <i>ABF2D</i>      | 9               | 26.6 $\pm$ 5.88            | 1.0 $\pm$ 0.31      |
|                   | 11              | 177.5 $\pm$ 37.25          | 7.1 $\pm$ 0.32      |
|                   | 25              | 419.5 $\pm$ 114.46         | 17.3 $\pm$ 0.41     |
| <i>ABF3A</i>      | 3               | 175.1 $\pm$ 43.54          | 1.0 $\pm$ 0.39      |
|                   | 13              | 1814.5 $\pm$ 358.18        | 12.3 $\pm$ 0.30     |
|                   | 8               | 6383.2 $\pm$ 877.40        | 47.5 $\pm$ 0.21     |
| <i>ABF3D</i>      | 1               | 17.2 $\pm$ 3.22            | 1.0 $\pm$ 0.09      |
|                   | 14              | 406.8 $\pm$ 60.34          | 26.2 $\pm$ 0.21     |
|                   | 13              | 770.7 $\pm$ 49.15          | 50.7 $\pm$ 0.95     |
| <i>ABF4A</i>      | 2               | 224.5 $\pm$ 14.40          | 1.0 $\pm$ 0.10      |
|                   | 5               | 887.8 $\pm$ 42.06          | 4.4 $\pm$ 0.08      |
|                   | 7               | 1563.3 $\pm$ 190.62        | 8.1 $\pm$ 0.19      |
| <i>ABF4D</i>      | 1               | 21.7 $\pm$ 1.47            | 1.0 $\pm$ 0.09      |
|                   | 3               | 42.4 $\pm$ 9.07            | 1.8 $\pm$ 0.31      |
|                   | 7               | 62.5 $\pm$ 13.17           | 2.7 $\pm$ 0.28      |

693

694



695 **Figure legends**

696 **Fig. 1.** The *AtAREB/ABFs* are differentially expressed in response to exogenous ABA, dehydration, and  
697 chilling temperatures. Transcript copy number per ng total RNA and relative expression in three week  
698 old plants in response to (A-B) 100  $\mu$ M exogenous ABA application, (C-D) dehydration, and (E-F)  
699 chilling temperatures (4 °C). Data are means of three biological replicates and three technical replicates  
700  $\pm$  SD.

701  
702 **Fig. 2.** The *GhABF* homologs are differentially expressed in response to exogenous ABA, dehydration,  
703 and chilling temperatures. Transcript copy number per ng total RNA in six to eight week old plants in  
704 response to (A-D) 500  $\mu$ M exogenous ABA application, (E-H) dehydration, and (I-L) chilling  
705 temperatures (4 °C). Data are means of three biological replicates and three technical replicates  $\pm$  SD.

706  
707 **Fig. 3.** Ectopic *GhABF* protein expression is largely independent of transcript level. Protein  
708 accumulation in eight-day-old seedlings from transgenic lines, compared to WT, expressing  
709 *GhABF2D*, *GhABF3D*, and *GhABF4D* treated without and with 50  $\mu$ M ABA for 6 h. Coomassie blue  
710 staining was used as the loading control (5% of IP input).

711  
712 **Fig. 4.** Ectopic expression of the *GhABF* homologs in *Arabidopsis* can delay the reproductive  
713 transition. (A) Representative images of *G. hirsutum ABF* expressing transgenic *Arabidopsis* lines  
714 alongside WT *Arabidopsis*;  $\Delta$  5 days. (B) Comparison of the reproductive transition of *GhABF* ectopic  
715 expressing *Arabidopsis* lines relative to WT *Arabidopsis*. Negative values represent a precocious  
716 transition, positive values indicate a delay. Data are means of three independent replicates with an  
717 average of five plants each  $\pm$  SD. Student's *t*-test; \*  $P < 0.05$ , \*\*  $P < 0.01$ .

718  
719 **Fig. 5.** Ectopic *GhABF* expression in *Arabidopsis* can improve tolerance to water deficit and osmotic  
720 stress. (A) Relative survival (%) of transgenic lines as compared to WT *Arabidopsis* after 6 h  
721 dehydration. Data are means of three independent experiments with an average of ten plants each  $\pm$  SD.  
722 (B) Electrolyte leakage in response to increasingly negative water potentials. Data are means of three  
723 independent experiments with three replications each  $\pm$  SD. Student's *t*-test; \*  $P < 0.05$ , \*\*  $P < 0.01$ .

724

725

726 **Fig. 6.** Ectopic *GhABF* expression in *Arabidopsis* can improve cold tolerance, in a gene dependent  
727 manner. (A) Relative survival (%) of transgenic lines as compared to WT *Arabidopsis* after 5 h at -7  
728 °C. Data are means of three independent experiments with an average of ten plants each  $\pm$  SD. (B)  
729 Electrolyte leakage in response to increasingly negative temperatures. Data are means of three  
730 independent experiments with three replications each  $\pm$  SD. Student's *t*-test; \*  $P < 0.05$ , \*\*  $P < 0.01$ .  
731

732

733 **Figures**

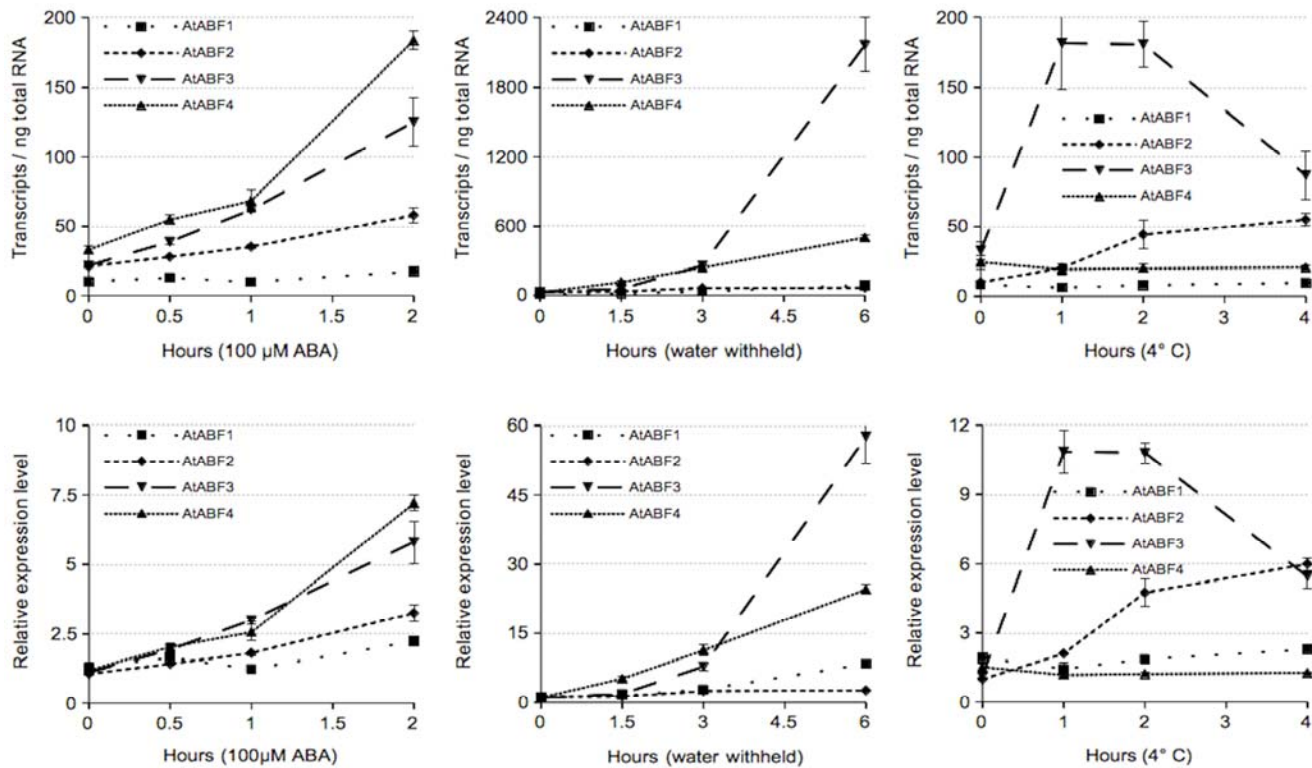

734

735

736

737

738

739 **Fig. 1**

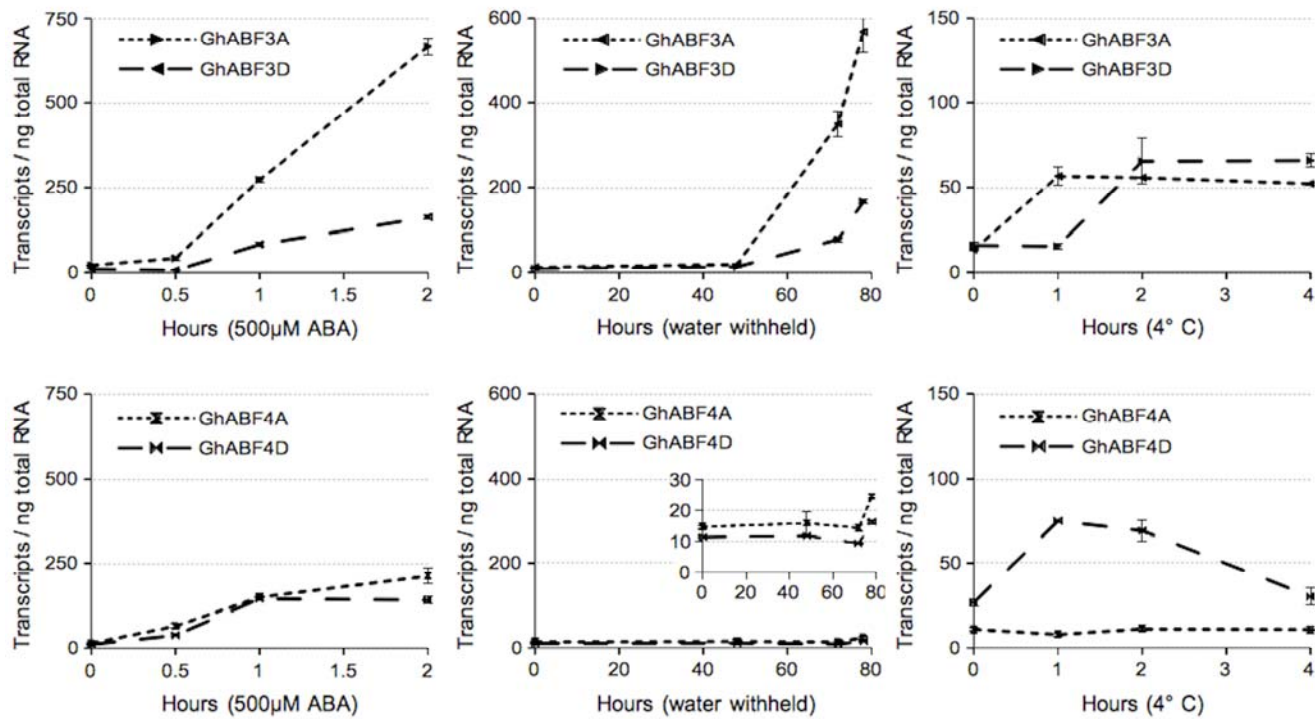

740

741

742

743

744

745 **Fig. 2**

746

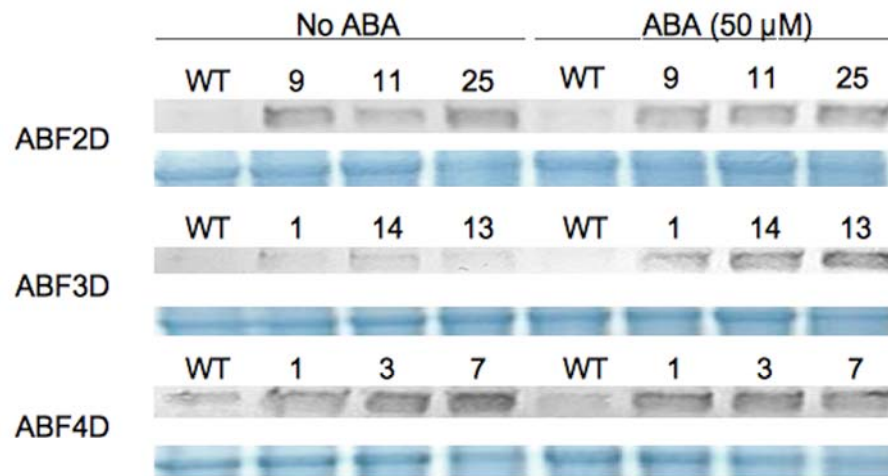

747

748

749

750

751

752 **Fig. 3**

753

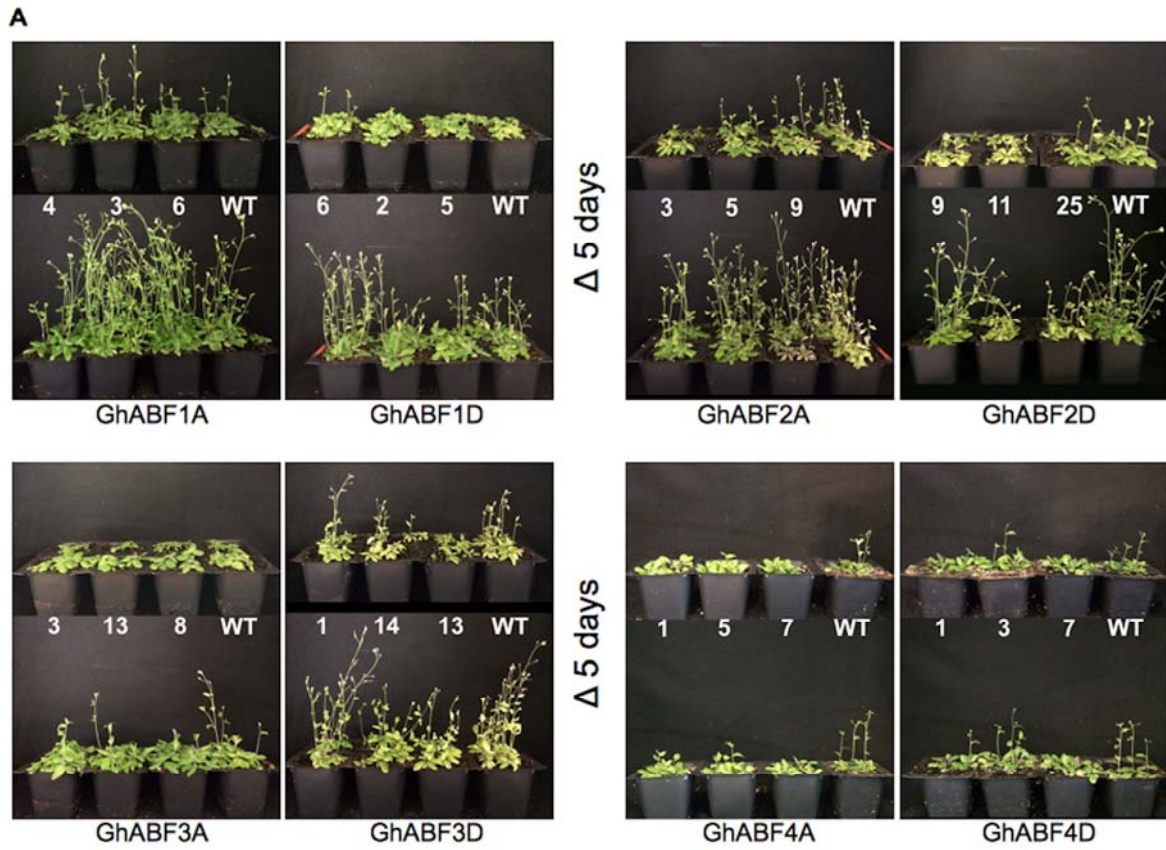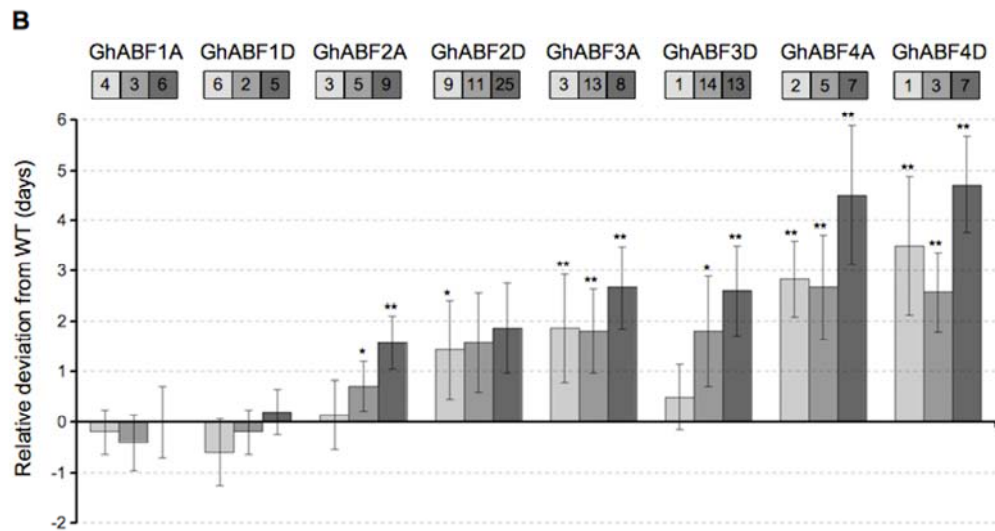

754 Fig. 4

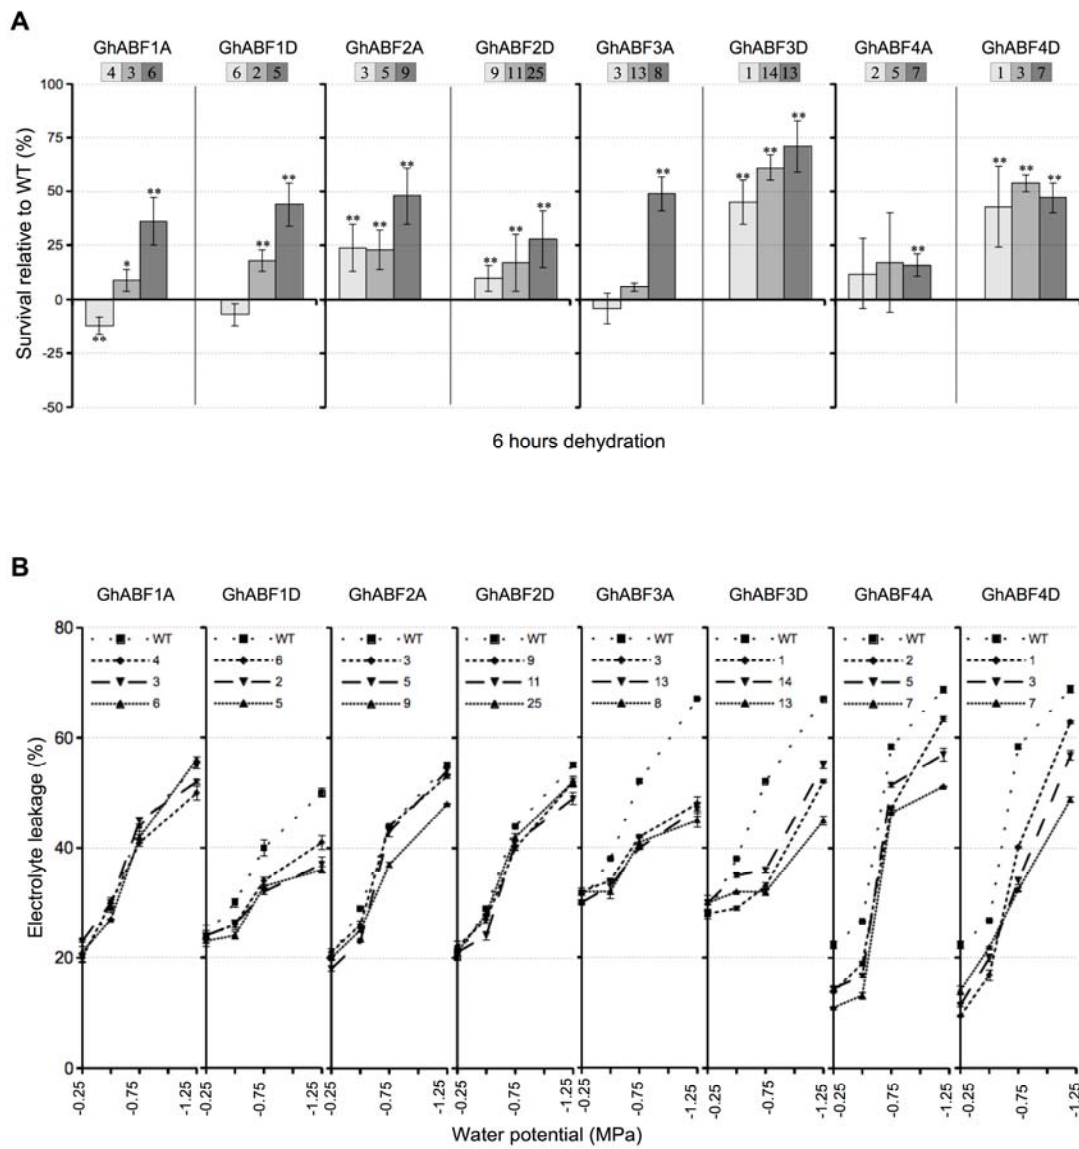

755 Fig. 5

756

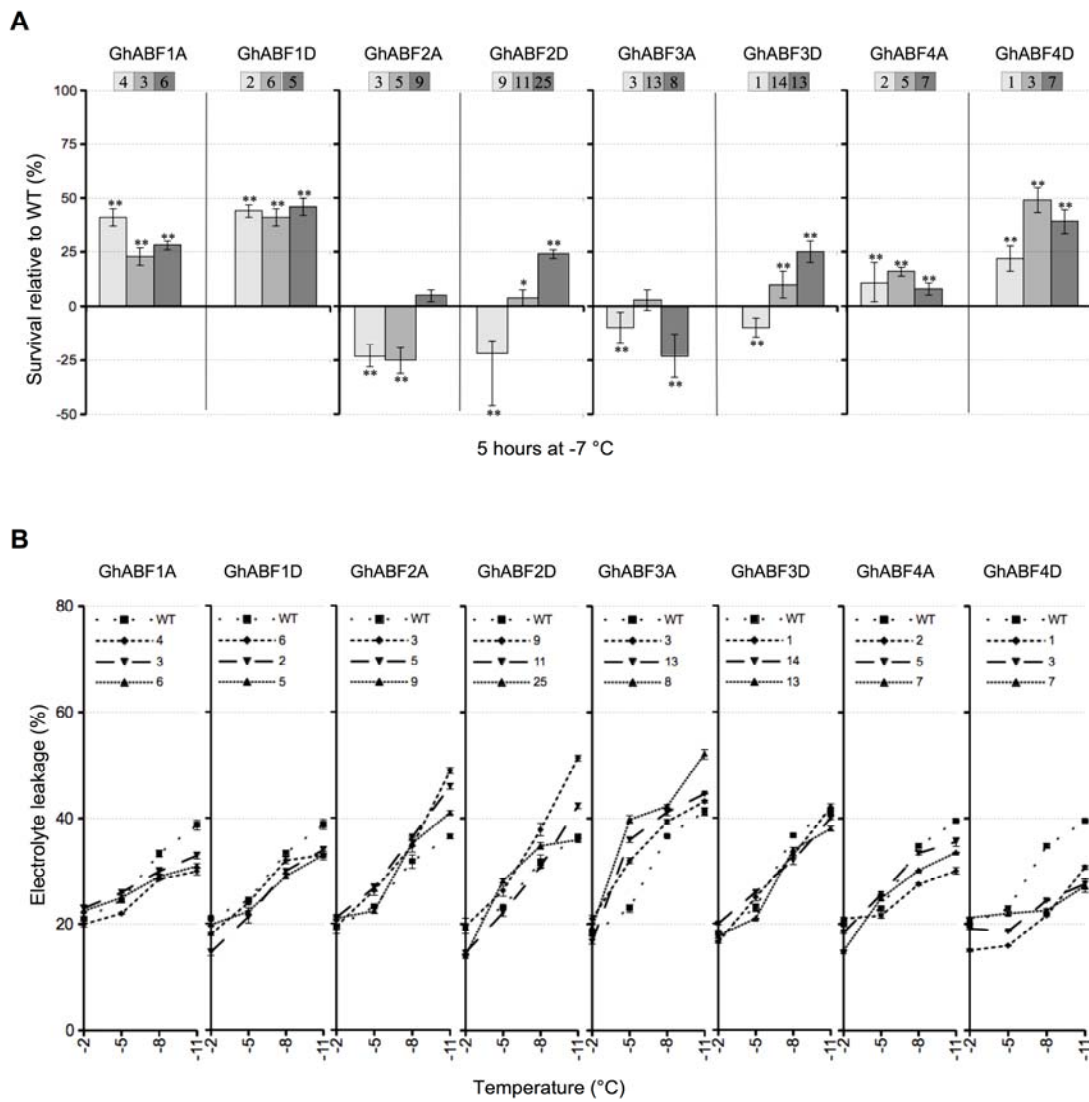

757 **Fig. 6**

758
